# Supplementary material for: Influence of algal organic matter on the attenuation of selected trace organic contaminants and dissolved organic matter in managed aquifer recharge: column studies
Source: Royal Society of Chemistry journal article supplement (doi:10.1039/d0ew00428f), 2020-01-01
Supplement: d0ew00428f1.pdf [file d0ew00428f1.pdf]

Influence of algal organic matter on the attenuation of selected trace organic contaminants and dissolved organic matter in managed aquifer recharge: column studies

Jin Hyung Noh, Soo Hyun So, Ji Won Park, Sung Kyu Maeng\*

Department of Civil and Environmental Engineering, Sejong University, 209 Neungdongro, Gwangjin-gu, Seoul 05006, Republic of Korea

\* Corresponding author. Tel.: +822-3408-3858; Fax: +822-3408-4332 (Sung Kyu Maeng)

E-mail address: smaeng@sejong.ac.kr

**Table S1.** Characteristics of Tancheon water amended with algal organic matter (AOM) (n= 6 - 9)

|                               | pH            | Electrical conductivity, $\mu\text{S}/\text{cm}$ | Dissolved organic carbon, $\text{mg}/\text{L}$ | UV absorbance at 254nm, $\text{cm}^{-1}$ | Specific UV absorbance, $\text{L}/\text{mg}\cdot\text{m}$ |
|-------------------------------|---------------|--------------------------------------------------|------------------------------------------------|------------------------------------------|-----------------------------------------------------------|
| Tancheon                      | $7.7 \pm 0.1$ | $540 \pm 30$                                     | $3.7 \pm 0.6$                                  | $0.07 \pm 0.01$                          | $1.98 \pm 0.10$                                           |
| Tancheon + AOM                | $8.7 \pm 0.1$ | $624 \pm 3$                                      | $7.4 \pm 0.4$                                  | $0.10 \pm 0.01$                          | $1.67 \pm 0.27$                                           |
| Tancheon + AOM+O <sub>3</sub> | $8.6 \pm 0.3$ | $622 \pm 30$                                     | $7.6 \pm 0.1$                                  | $0.08 \pm 0.01$                          | $1.33 \pm 0.21$                                           |

**Table S2.** Dissolved organic carbon (DOC), UV absorbance at 254nm (UV<sub>254</sub>), specific UV absorbance (SUVA) of extracellular organic matter (EOM) and intracellular organic matter (IOM) of *Microcystis aeruginosa* (n= 2)

|     | DOC, $\text{mg}/\text{L}$ | UV <sub>254</sub> , $\text{cm}^{-1}$ | SUVA, $\text{L}/\text{mg}\cdot\text{m}$ |
|-----|---------------------------|--------------------------------------|-----------------------------------------|
| IOM | 2.4                       | 0.01                                 | 0.42                                    |
| EOM | 1.7                       | 0.01                                 | 0.59                                    |

**Table. S3.** Fractionations of extracellular organic matter (EOM) and intracellular organic matter (IOM), Tancheon water, and Tancheon water amended with algal organic matter (AOM) determined by LC-OCD (n= 2)

|                  | Biopolymers,<br>ug/L | Humic<br>substances,<br>ug/L | Building<br>blocks,<br>ug/L | Low<br>molecular<br>weight<br>(LMW)<br>neutrals,<br>ug/L | LMW acids,<br>ug/L |
|------------------|----------------------|------------------------------|-----------------------------|----------------------------------------------------------|--------------------|
| IOM              | 148<br>(8.2%)        | 100<br>(5.5%)                | 142<br>(7.8%)               | 1265<br>(69.9%)                                          | 156<br>(8.6%)      |
| EOM              | 358<br>(31.5%)       | 223<br>(19.6%)               | 103<br>(9.1%)               | 439<br>(38.6%)                                           | 14<br>(1.2%)       |
| Tancheon         | 296<br>(7.1%)        | 1418<br>(34.1%)              | 939<br>(22.6%)              | 1326<br>(31.9%)                                          | 184<br>(4.4%)      |
| Tancheon<br>+AOM | 802<br>(11.3%)       | 1741<br>(24.5%)              | 1184<br>(16.7%)             | 3030<br>(42.6%)                                          | 354<br>(5.0%)      |

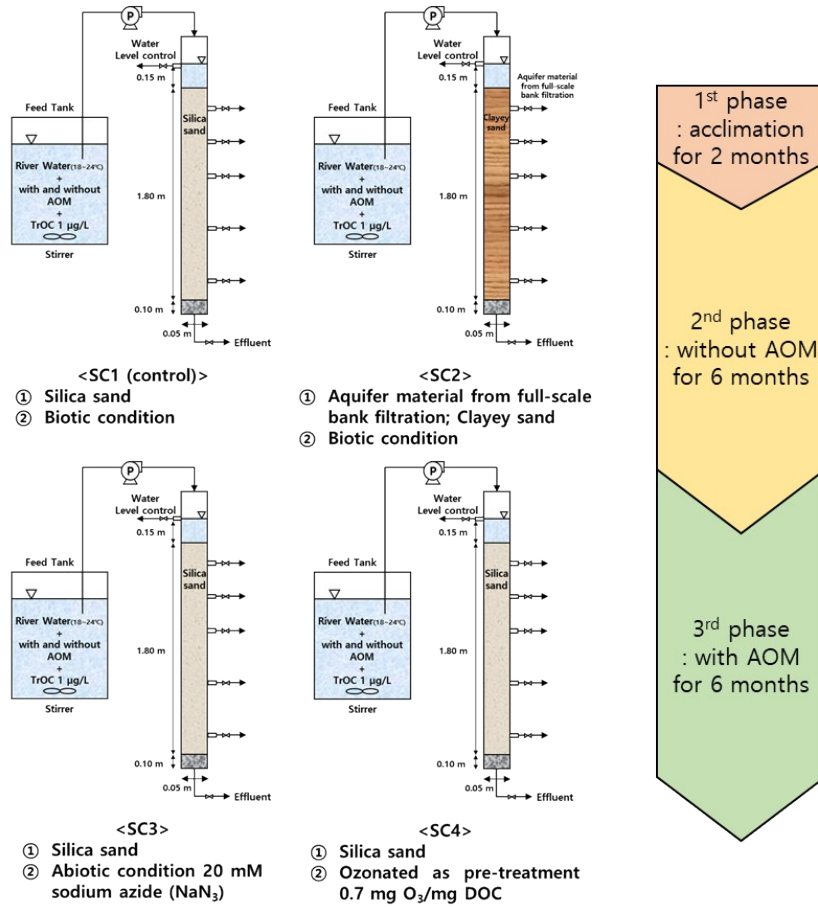

**Fig. S1.** Schematic diagram of the experimental set up and operated conditions

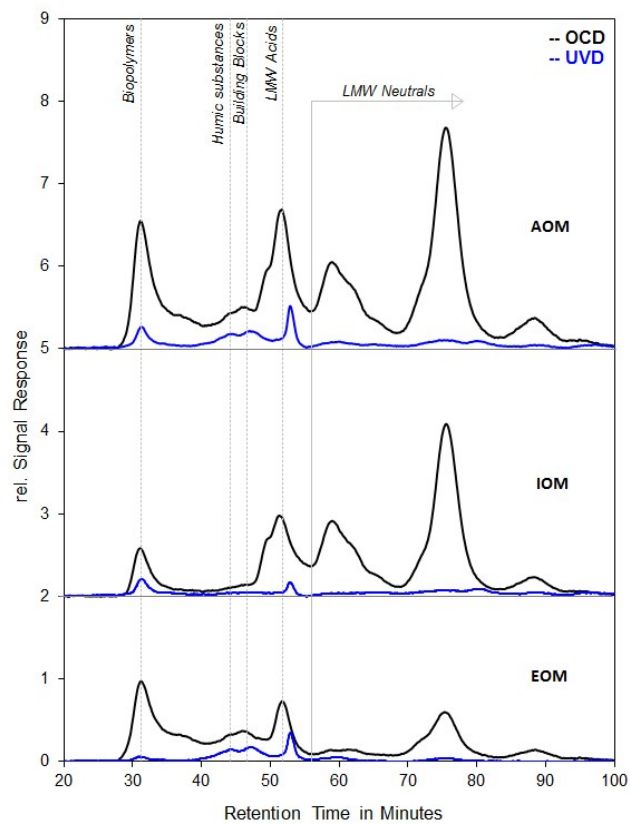

**Fig. S2.** LC-OCD chromatograms of algal organic matter (AOM), extracellular organic matter (EOM) and intracellular organic matter (IOM)

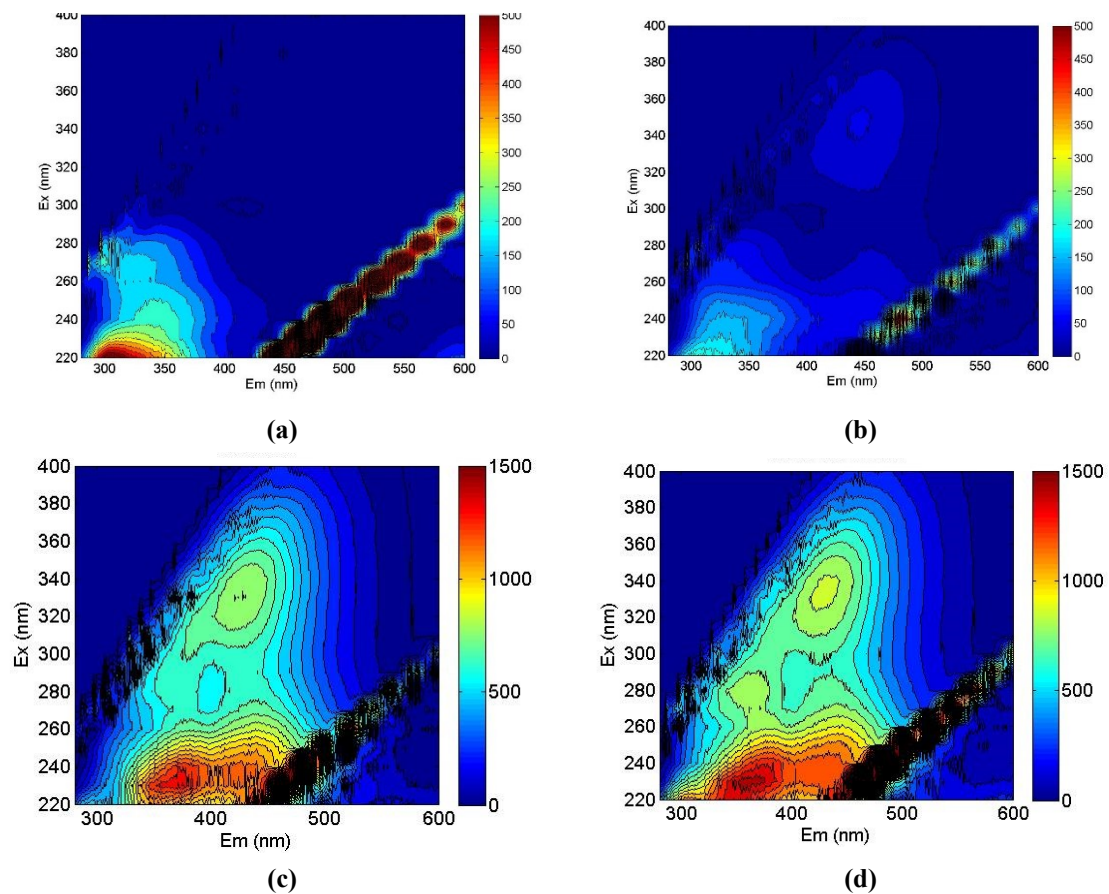

**Fig. S3.** Fluorescence excitation-emission matrix spectra of intracellular organic matter (IOM) (a), extracellular organic matter (EOM) (b), Tancheon water (c), and Tancheon water amended with algal organic matter (AOM) (d)

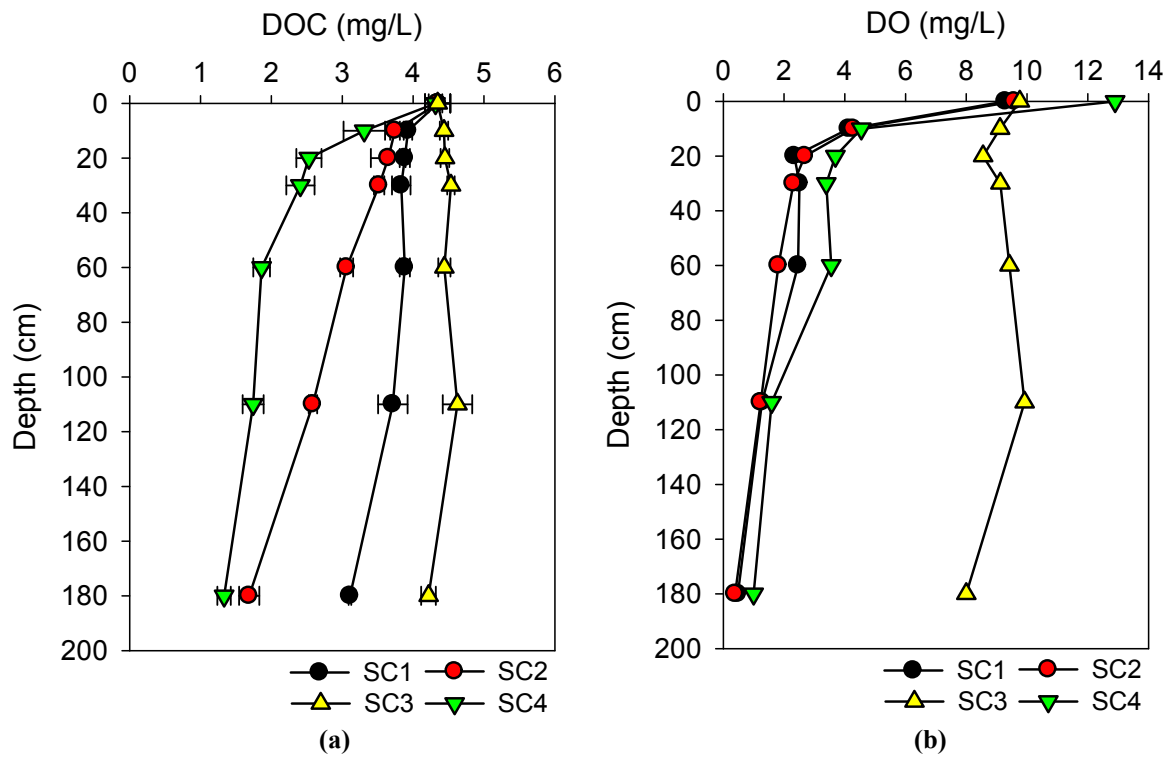

**Fig. S4.** Dissolved organic carbon (DOC) (a) (n=3) and dissolved oxygen (DO) (b) (n=1) profiles of SC1, SC2, SC3 and SC4

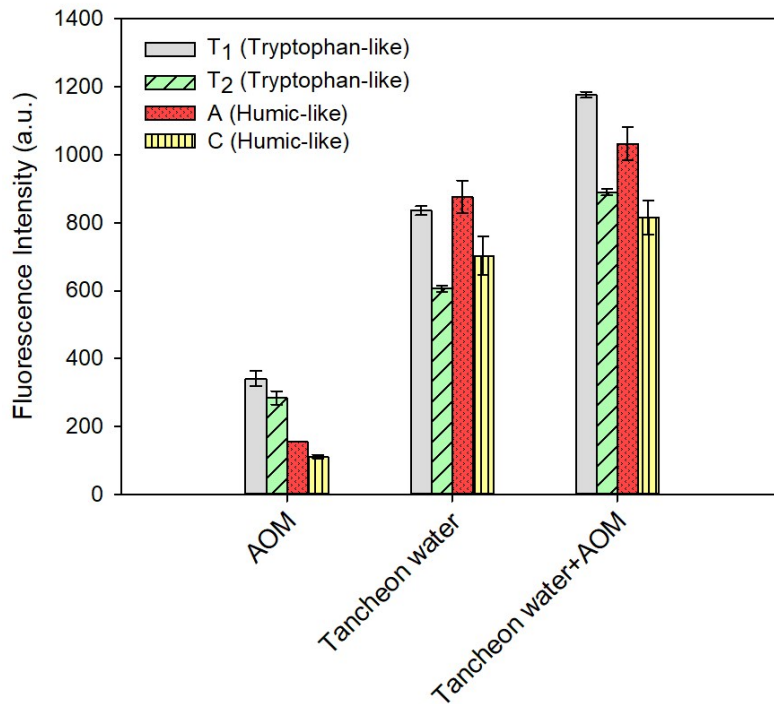

**Fig. S5.** Fluorescence intensity of algal organic matter (AOM), Tancheon water, and Tancheon water amended with AOM (n=3)

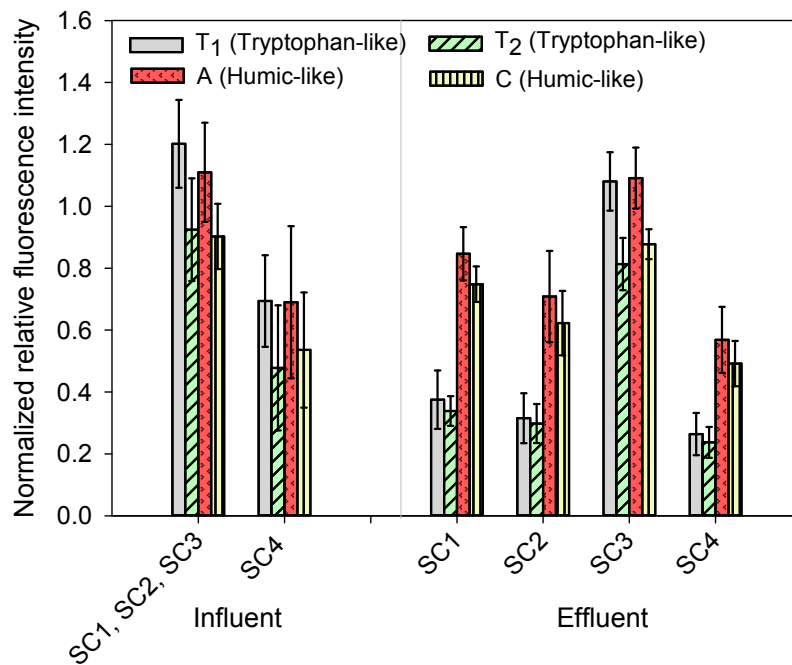

**Fig. S6.** Normalized relative fluorescence intensity of T1, T2, A, and C of SC1, SC2, SC3 and SC4 (n=3)

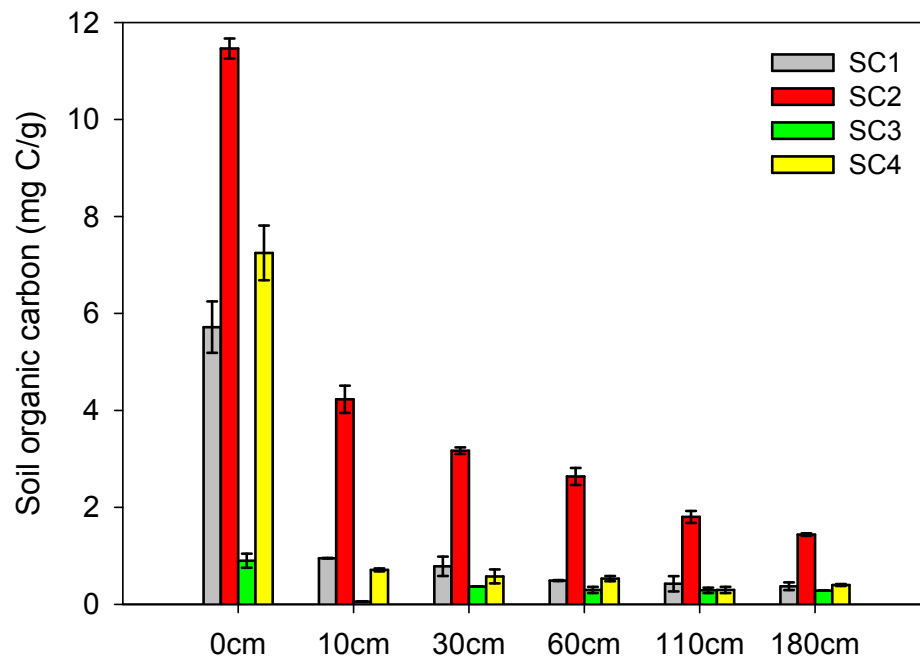

**Fig. S7.** Soil organic matter profile of SC1, SC2, SC3, and SC4 (n=2)



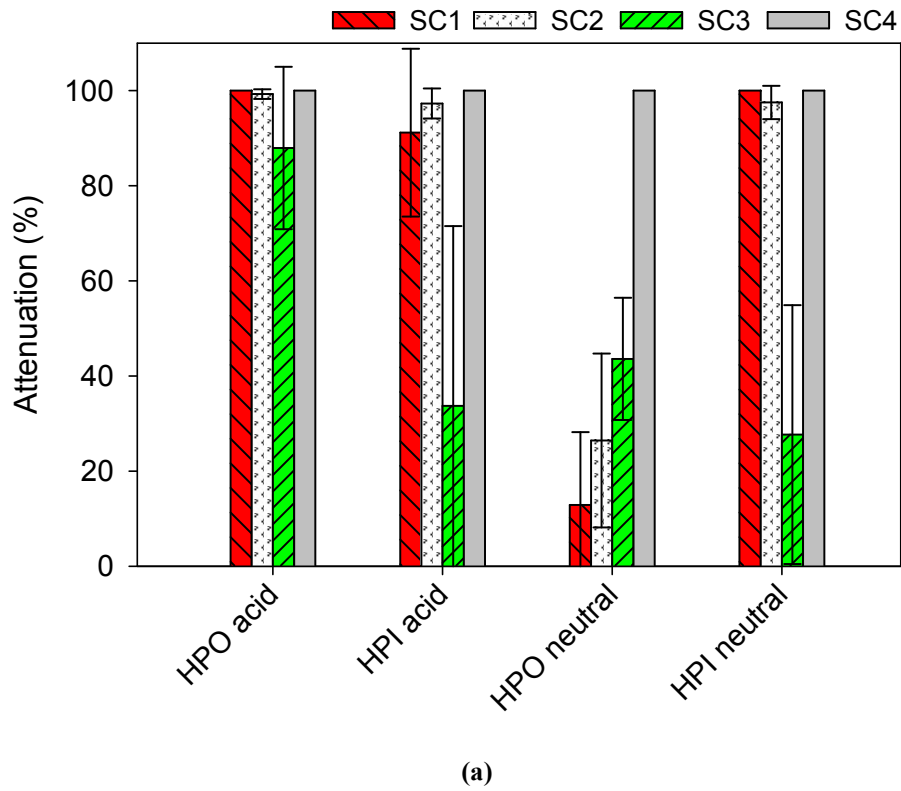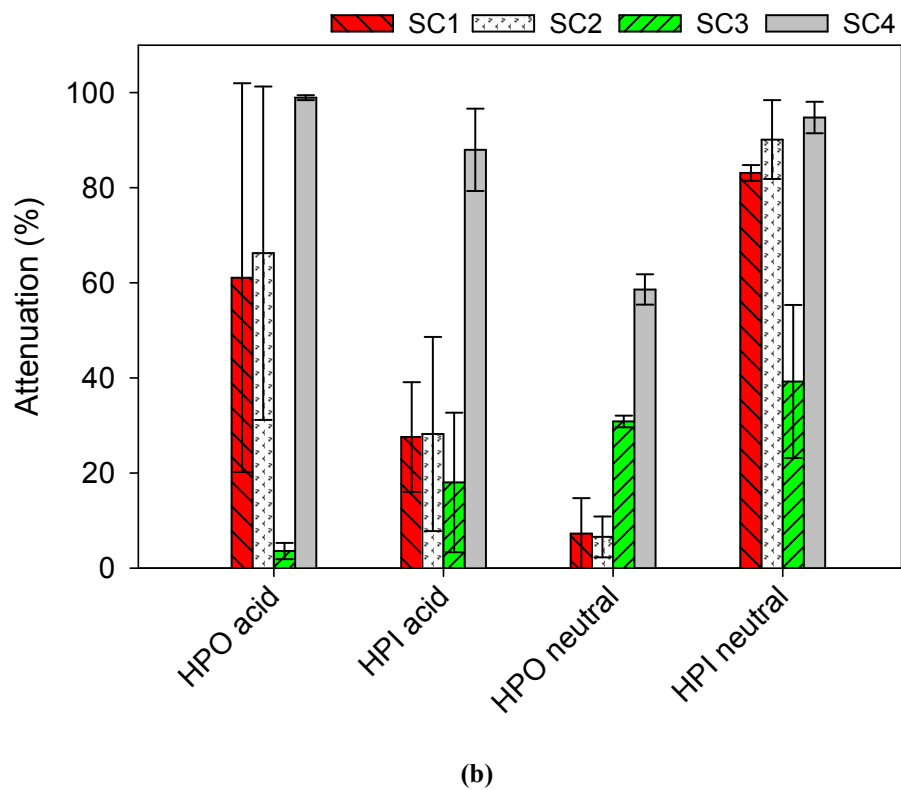

**Fig. S8.** Attenuation rates for selected trace organic contaminants with respect to hydrophobicity and charge characteristics and the presence of algal organic matter (AOM) for SC1, SC2, SC3 and SC4 (w/o AOM (a) and w/ AOM (b)) (n=2)
